# Supplementary material for: C60ThSe2/ITO interface formation: photoemission-based charge-transfer recognition for organic electronics applications
Source: Royal Society of Chemistry journal article supplement (doi:10.1039/d2cp00844k), 2022-01-01
Supplement: d2cp00844k1.pdf [file d2cp00844k1.pdf]

Supplementary Information  
for

**C<sub>60</sub>ThSe<sub>2</sub>/ITO interface formation: photoemission – based charge transfer recognition for organic electronics application**

Maciej Krzywiecki<sup>1\*</sup>, Szymon Smykała<sup>2</sup>, Justyna Kurek<sup>3</sup>, Sylwia Fijak<sup>3</sup>, Radosław Motyka<sup>3</sup>, Sandra Pluczyk-Małek<sup>3</sup>, and Agata Blacha-Grzechnik<sup>3</sup>

<sup>1</sup> Institute of Physics – CSE, Silesian University of Technology, Konarskiego 22B, 44-100 Gliwice, Poland

<sup>2</sup> Institute of Engineering Materials and Biomaterials, Silesian University of Technology, Konarskiego 18A, 44-100, Gliwice, Poland

<sup>3</sup> Faculty of Chemistry, Silesian University of Technology, Strzody 9, 44-100 Gliwice, Poland

**Cyclic Voltammetry**

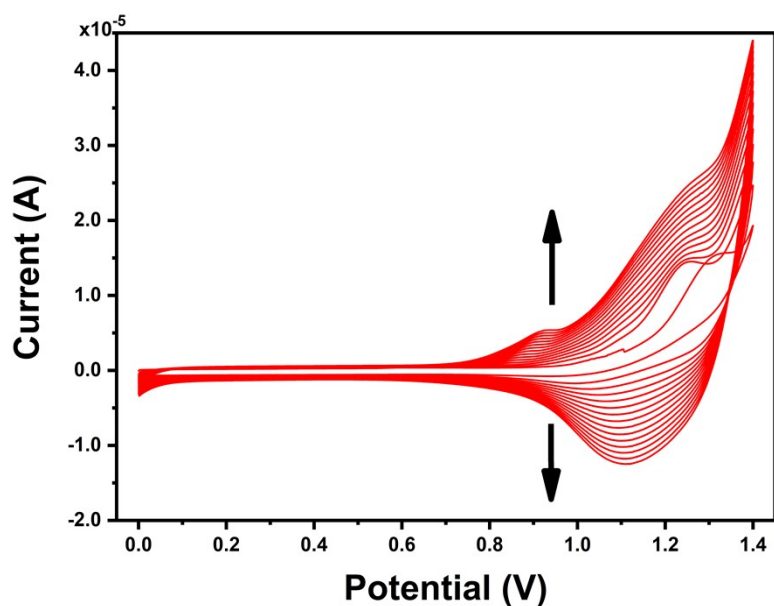

**Fig.S1.** CV curve recorded in 0.1 mM solution C<sub>60</sub>ThSe<sub>2</sub> in 0.2 M Bu<sub>4</sub>NBF<sub>4</sub>/CH<sub>2</sub>Cl<sub>2</sub> with ITO as a working electrode, 15 scan cycles, scan rate: 0.1 V/s.

Fig.S1 presents the CV curve recorded in C<sub>60</sub>ThSe<sub>2</sub> solution with ITO acting as a working electrode. Similarly to our previous studies on the terthiophene-fullerene dyads [1], the irreversible oxidation is observed at ca. 1.3 V, that arises from the oxidation of organic unit initiating the electropolymerization process. Further sweeping of the potential reveals the new redox couple at ca. 1.1 V and causes the continuous increase in the recorded current. These together confirm the

polymerization of  $C_{60}ThSe_2$  dyad and the simultaneous deposition of the conjugated polymeric film on the ITO surface.

### UV-VIS Spectroscopy

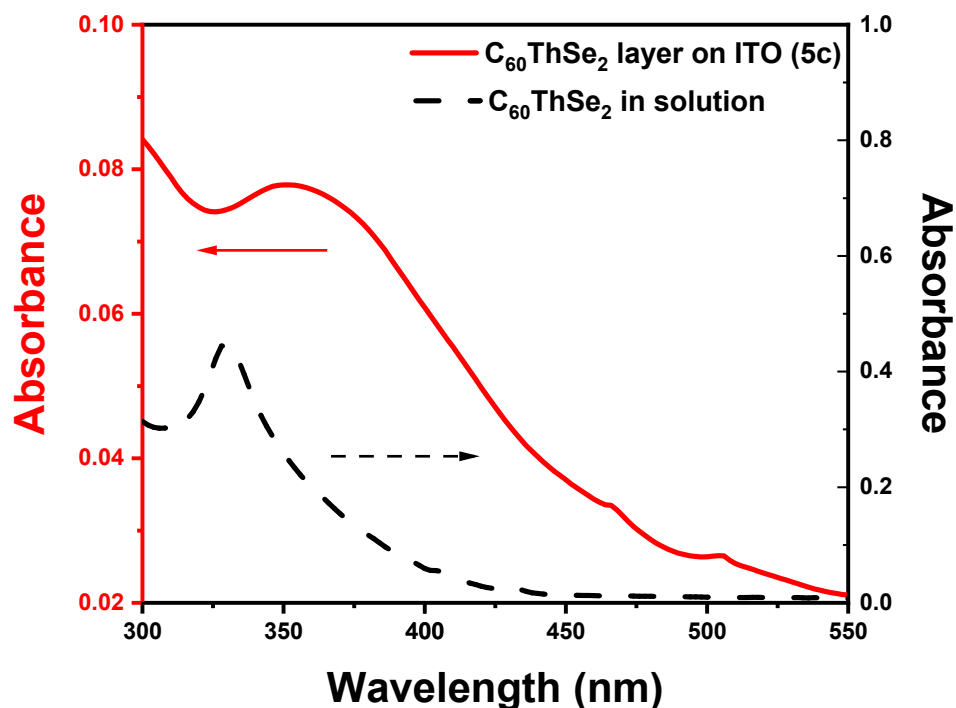

**Fig.S2.** UV-Vis spectra of  $C_{60}ThSe_2/ITO$  (5c) (red solid line) and  $C_{60}ThSe_2$  in dichloromethane (black dashed line). In the case of UV-Vis spectrum of the layer, ITO was used as a reference, while in the case of  $C_{60}ThSe_2$  solution – dichloromethane.

UV-Vis spectra of electrochemically deposited  $C_{60}ThSe_2$  layer, given in Fig.S2, show one broad absorption band with maximum at ca. 360 nm, arising from the fullerene and conjugated polymeric chain ( $\pi \rightarrow \pi^*$  transition) absorption [1]. The recorded band is significantly broaden with onset being bathochromically shifted when compared with the UV-Vis spectrum of  $C_{60}ThSe_2$  dyad in solution, indicating the elongation of the conjugated chain [2]. The onset of the absorbance band, and thus the calculated optical band gap, was steadily increasing with the increase in the number of electropolymerization cycles (Table S1).

Tab. SI 1. Optical data

| Sample set | $\lambda_{onset}/nm$ | Optical band gap $E_g/eV$ |
|------------|----------------------|---------------------------|
| 5c         | 465                  | 2.67                      |
| 10c        | 484                  | 2.56                      |
| 15c        | 493                  | 2.52                      |

\*Optical band gap  $E_g=1240/\lambda_{onset}$



## References

- [1] A. Blacha-Grzechnik, M. Krzywiecki, R. Motyka, Electrochemically Polymerized Terthiophene – C60 Dyads for the Photochemical Generation of Singlet Oxygen, *J. Phys. Chem. C.* 123 (2019) 25915–25924. <https://doi.org/10.1021/acs.jpcc.9b06101>.
- [2] B. Lu, S. Zhen, S. Ming, J. Xu, G. Zhao, *RSC Advances*, (2015) 70649–70660. <https://doi.org/10.1039/c5ra11849b>.
